# Supplementary material for: Cascade surface modification of colloidal quantum dot inks enables efficient bulk homojunction photovoltaics
Source: PubMed Central journal article supplement (PMC6941986; doi:10.1038/s41467-019-13437-2), 2020-01-03
Supplement: 41467_2019_13437_MOESM2_ESM.pdf [file 41467_2019_13437_MOESM2_ESM.pdf]

## Solar Cells Reporting Summary

Nature Research wishes to improve the reproducibility of the work that we publish. This form is intended for publication with all accepted papers reporting the characterization of photovoltaic devices and provides structure for consistency and transparency in reporting. Some list items might not apply to an individual manuscript, but all fields must be completed for clarity.

For further information on Nature Research policies, including our [data availability policy](#), see [Authors & Referees](#).

## ▶ Experimental design

## Please check: are the following details reported in the manuscript?

## 1. Dimensions

- Area of the tested solar cells  Yes  No Described in Methods (Solar cell measurement). The area of certified device was approximately 0.049 cm<sup>2</sup> (Supplementary Figure 14)
- Method used to determine the device area  Yes  No Described in Methods (Solar cell measurement). Optical aperture is used to define the active area.

## 2. Current-voltage characterization

- Current density-voltage (J-V) plots in both forward and backward direction  Yes  No Newport certificate is shown in Supplementary Figure 14.
- Voltage scan conditions  Yes  No Described in Methods (Solar cell measurement).  
*For instance: scan direction, speed, dwell times*
- Test environment  Yes  No Newport certificate tested in N<sub>2</sub>. Temperature 25C.  
*For instance: characterization temperature, in air or in glove box*
- Protocol for preconditioning of the device before its characterization  Yes  No Described in Methods (Solar cell measurement).
- Stability of the J-V characteristic  Yes  No Long-term stability at the maximum power point is shown in Supplementary Figure 16.  
*Verified with time evolution of the maximum power point or with the photocurrent at maximum power point; see ref. 7 for details.*

## 3. Hysteresis or any other unusual behaviour

- Description of the unusual behaviour observed during the characterization  Yes  No No hysteresis was observed for all CQD PV devices, including both the control devices and bulk homojunction devices. The hysteresis-free behavior in CQD PVs is also widely-accepted in literatures.
- Related experimental data  Yes  No Newport certificate is shown in Supplementary Figure 14.

## 4. Efficiency

- External quantum efficiency (EQE) or incident photons to current efficiency (IPCE)  Yes  No EQE data is described in Figure 5e.
- A comparison between the integrated response under the standard reference spectrum and the response measure under the simulator  Yes  No Described in the manuscript (Figure 5d and 5e)
- For tandem solar cells, the bias illumination and bias voltage used for each subcell  Yes  No Not applicable. No tandem devices were involved in this work.

## 5. Calibration

- Light source and reference cell or sensor used for the characterization  Yes  No Described in Methods (Solar cell measurement).
- Confirmation that the reference cell was calibrated and certified  Yes  No Described in Methods (Solar cell measurement).

|                                                                                                                                                                                               |                                                                        |                                                                                                                         |
|-----------------------------------------------------------------------------------------------------------------------------------------------------------------------------------------------|------------------------------------------------------------------------|-------------------------------------------------------------------------------------------------------------------------|
| Calculation of spectral mismatch between the reference cell and the devices under test                                                                                                        | <input checked="" type="checkbox"/> Yes<br><input type="checkbox"/> No | Described in Methods (Solar cell measurement).                                                                          |
| <b>6. Mask/aperture</b>                                                                                                                                                                       |                                                                        |                                                                                                                         |
| Size of the mask/aperture used during testing                                                                                                                                                 | <input checked="" type="checkbox"/> Yes<br><input type="checkbox"/> No | Described in Methods (Solar cell measurement).                                                                          |
| Variation of the measured short-circuit current density with the mask/aperture area                                                                                                           | <input checked="" type="checkbox"/> Yes<br><input type="checkbox"/> No | See Methods (Solar cell measurement) and Supplementary Figure 14. Tested with aperture between solar source and device. |
| <b>7. Performance certification</b>                                                                                                                                                           |                                                                        |                                                                                                                         |
| Identity of the independent certification laboratory that confirmed the photovoltaic performance                                                                                              | <input checked="" type="checkbox"/> Yes<br><input type="checkbox"/> No | Newport certificate is shown in Supplementary Figure 14.                                                                |
| A copy of any certificate(s)<br><i>Provide in Supplementary Information</i>                                                                                                                   | <input checked="" type="checkbox"/> Yes<br><input type="checkbox"/> No | Newport certificate is shown in Supplementary Figure 14.                                                                |
| <b>8. Statistics</b>                                                                                                                                                                          |                                                                        |                                                                                                                         |
| Number of solar cells tested                                                                                                                                                                  | <input checked="" type="checkbox"/> Yes<br><input type="checkbox"/> No | Total 160 devices were used for histograms described in Supplementary Figure 15.                                        |
| Statistical analysis of the device performance                                                                                                                                                | <input checked="" type="checkbox"/> Yes<br><input type="checkbox"/> No | Histograms of efficiency are shown in Supplementary Figure 15.                                                          |
| <b>9. Long-term stability analysis</b>                                                                                                                                                        |                                                                        |                                                                                                                         |
| Type of analysis, bias conditions and environmental conditions<br><i>For instance: illumination type, temperature, atmosphere humidity, encapsulation method, preconditioning temperature</i> | <input checked="" type="checkbox"/> Yes<br><input type="checkbox"/> No | Long-term stability at the maximum power point is shown in Supplementary Figure 16.                                     |
